# Supplementary material
Source: PubMed Central journal article supplement (PMC4558392)
Supplement: NIHMS698806-supplement-Supp_FigureS1-S3.pdf [file NIHMS698806-supplement-Supp_FigureS1-S3.pdf]

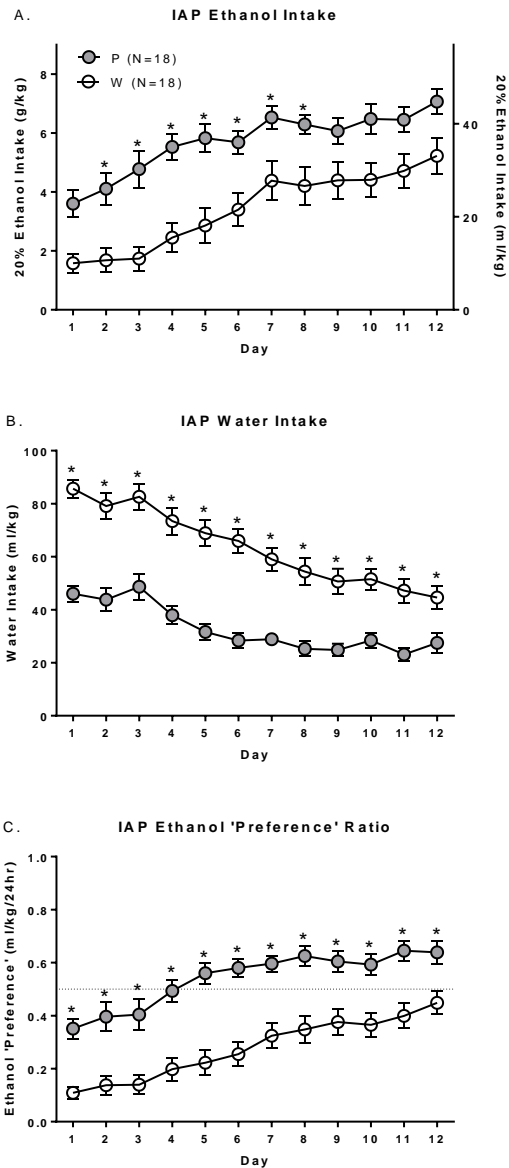

SUPPL1. Alcohol and water intake/preference over the course of IAP. **A)** 20% alcohol intake was greater overall in P vs. Wistar and increased in both groups over days. **B)** Water intake was greater on all days in Wistar vs. P and decreased in both groups over days; the rate of decrease in Wistar was greater than that of P rats. **C)** Preference for 20% alcohol was greater in P vs. Wistar and increased in both groups over days. \*'s indicate within-line differences from day 1 (Dunnett's within-line vs. Day 1;  $p$ 's<.05).

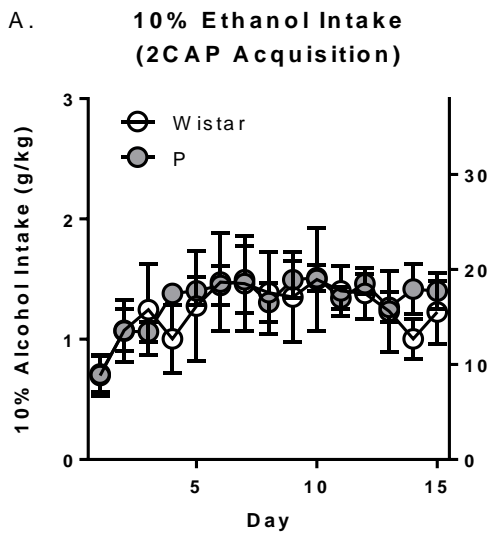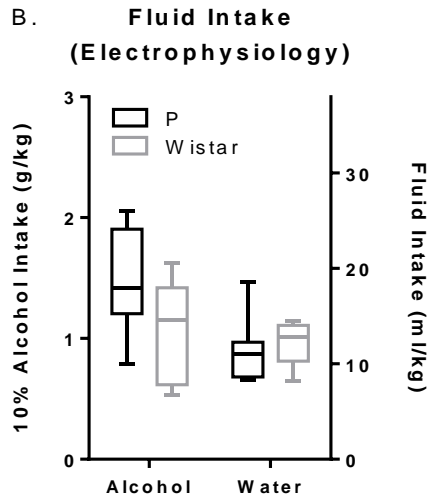

SUPPL2. Mean alcohol 2CAP acquisition and mean fluid intake on days of electrophysiological recordings. There were no significant differences between P and Wistar rats in fluid intake during acquisition of 2CAP **(A)** or on days where electrophysiology was recorded **(B)**.

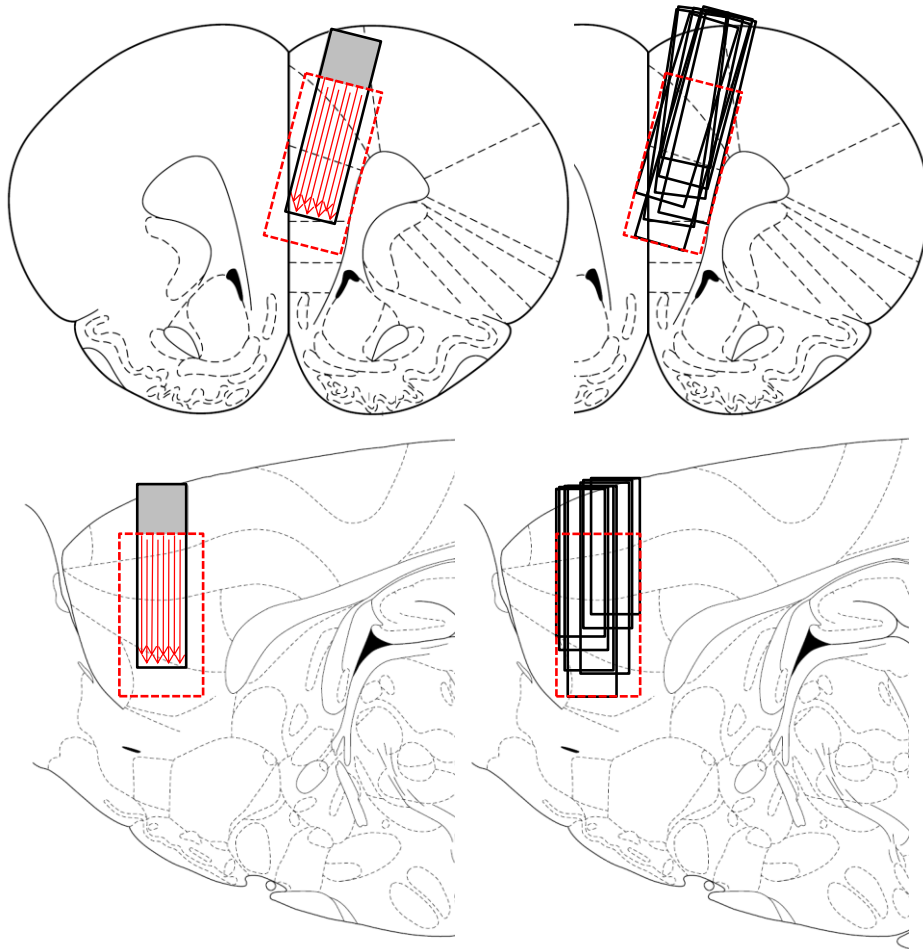

SUPPL3. Coronal (Interaural 11.10 mm; Bregma 2.70 mm) and sagittal (lateral 0.90 mm) sections (Paxinos and Watson, 1998) depicting probe placements. Average locations are depicted on the left, and individual placements are depicted on the right. The red/dashed box depicts the outer boundaries of recording locations.
